# Supplementary material
Source: publisher site journal article supplement (https://www.dovepress.com/get_supplementary_file.php?f=321824.docx)
Supplement: Supplementary file 1 [file get_supplementary_file.php]

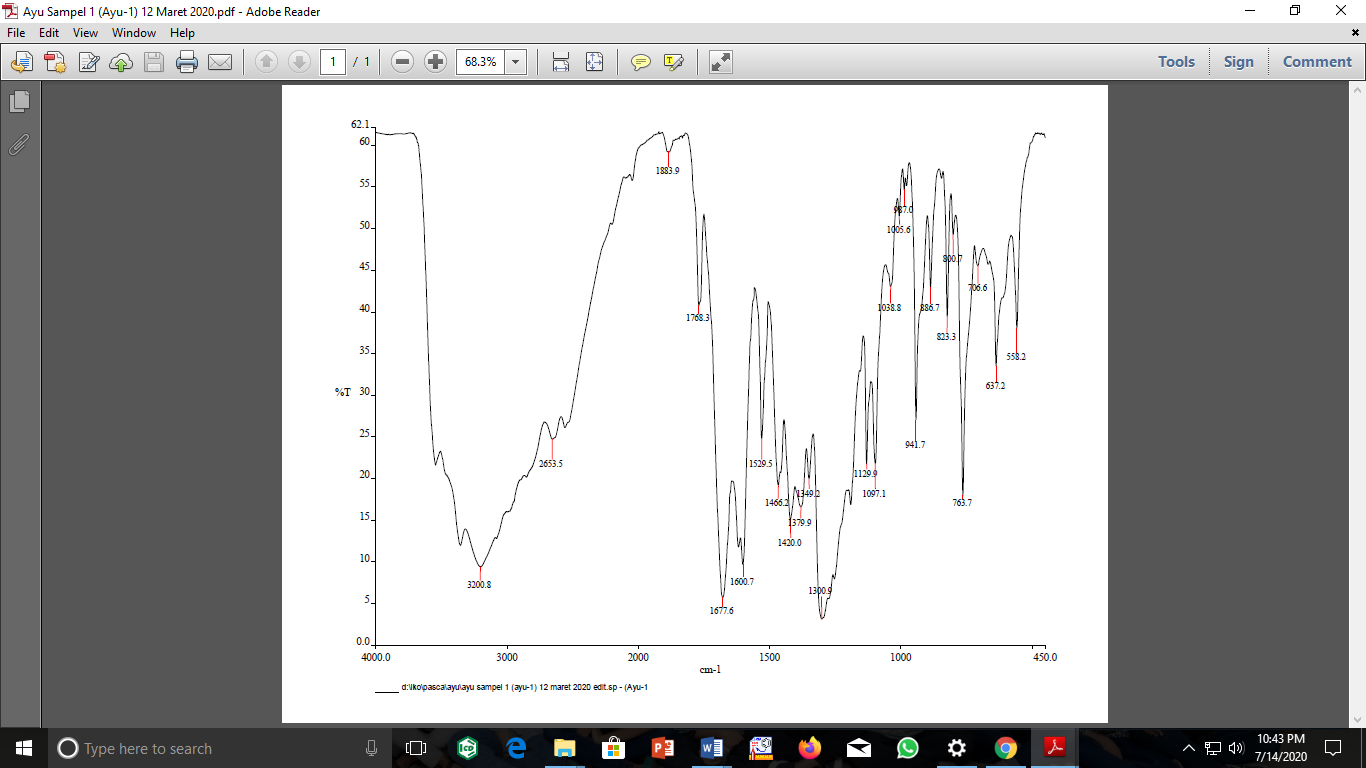


**Supplementary Material 1** IR spectrum for compound **1**.

**
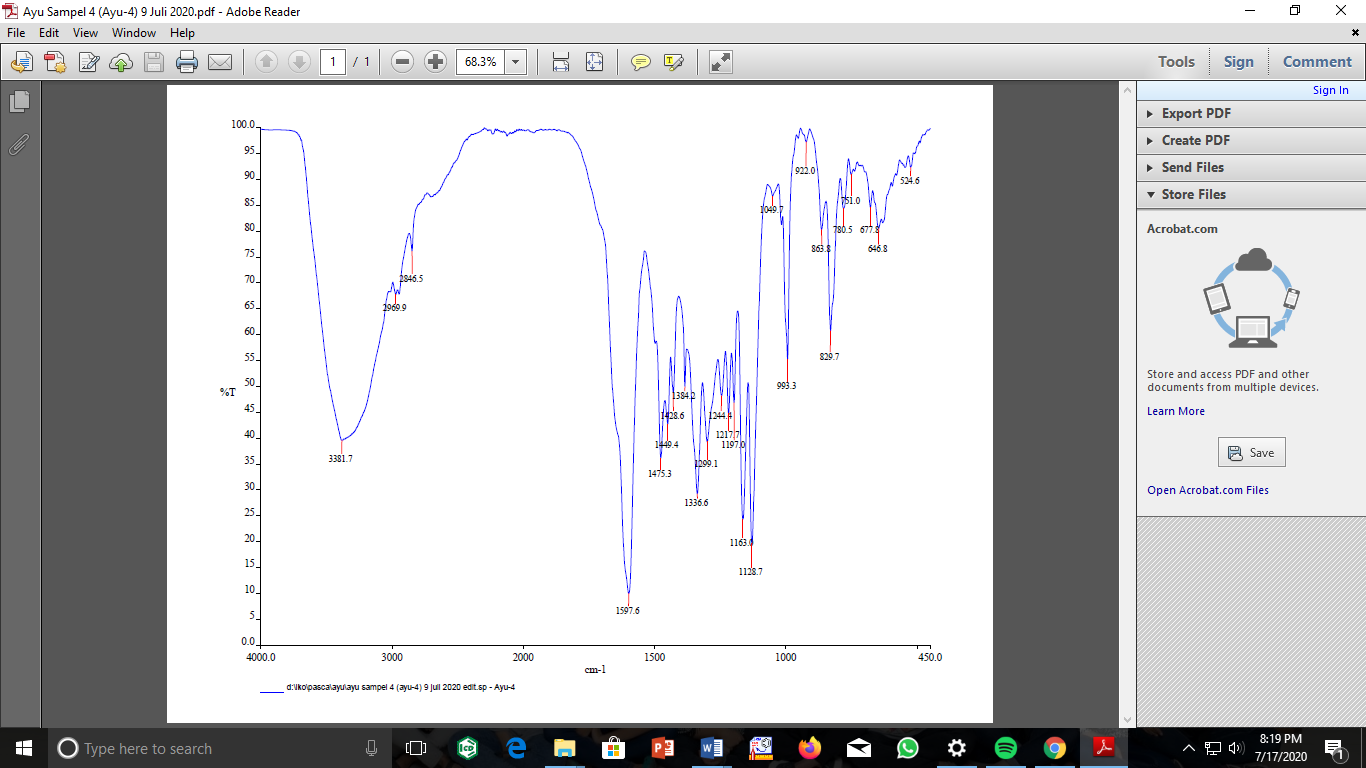
**

**Supplementary Material 2** IR spectrum for compound **2**.


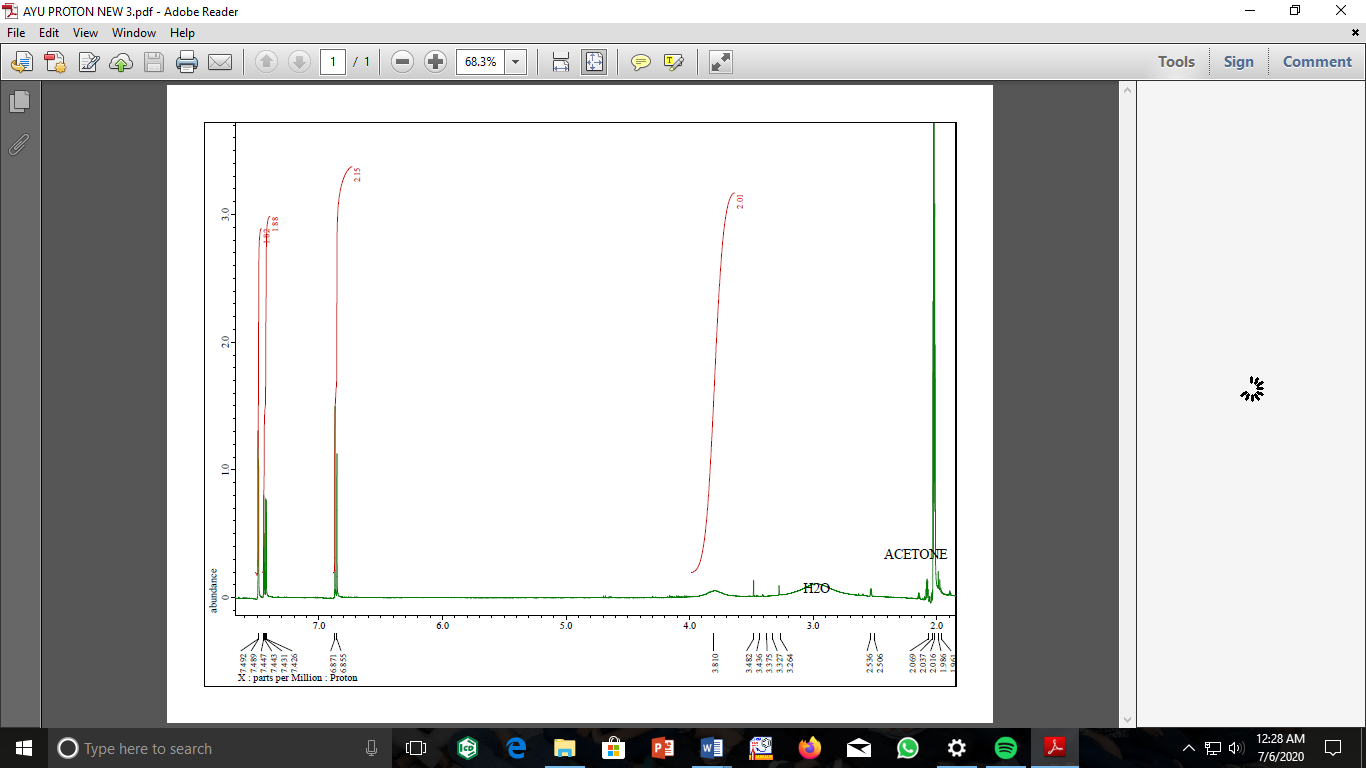


**Supplementary Material 3** 1H-NMR spectrum for compound **1**.


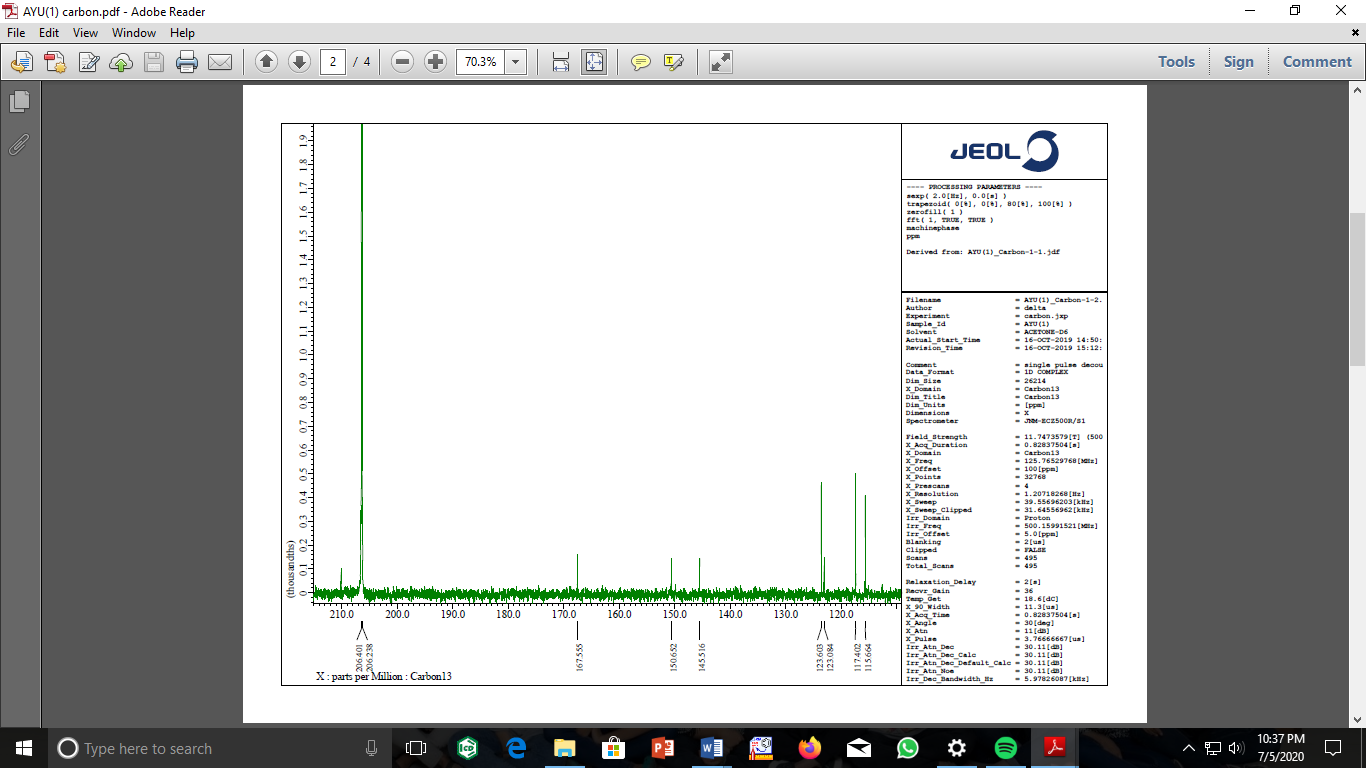


**Supplementary Material 4** 13C-NMR spectrum for compound **1**.


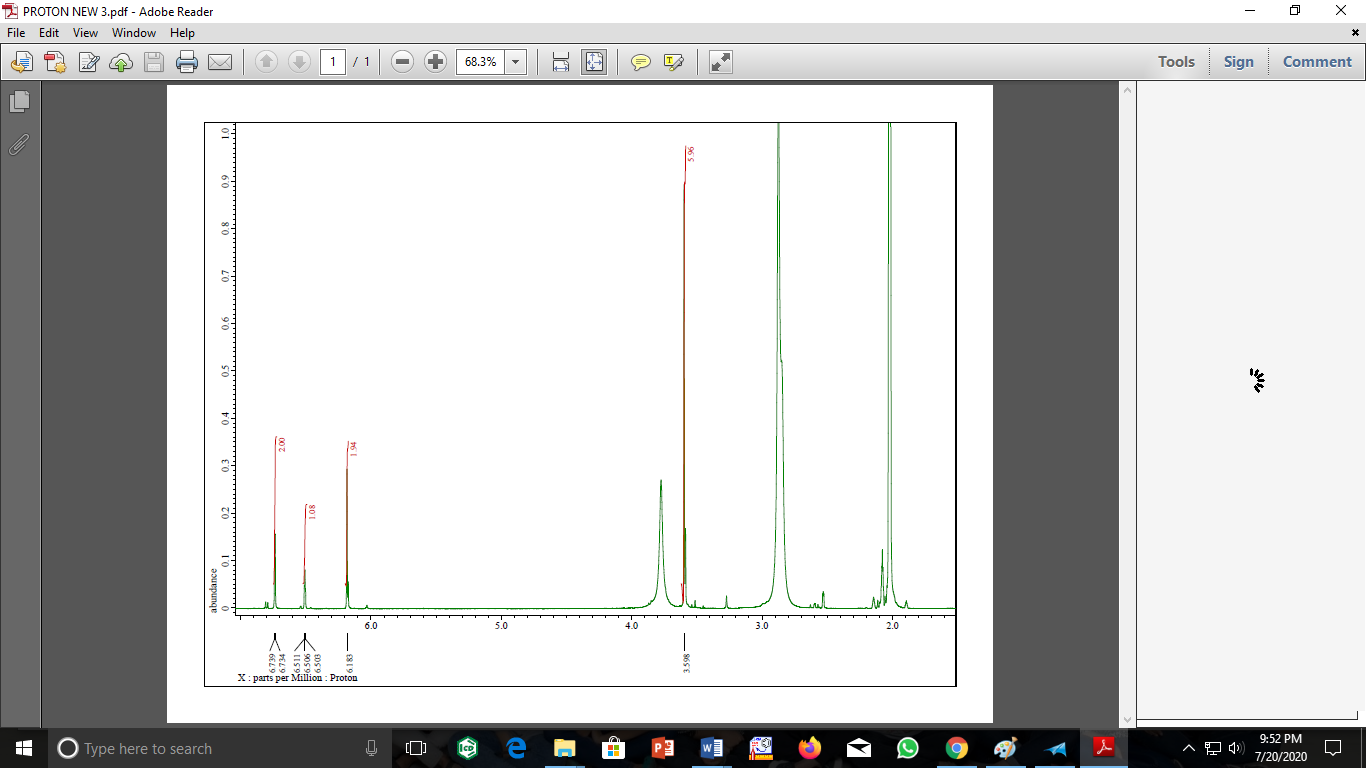


**Supplementary Material 5** 1H-NMR spectrum for compound **2**.


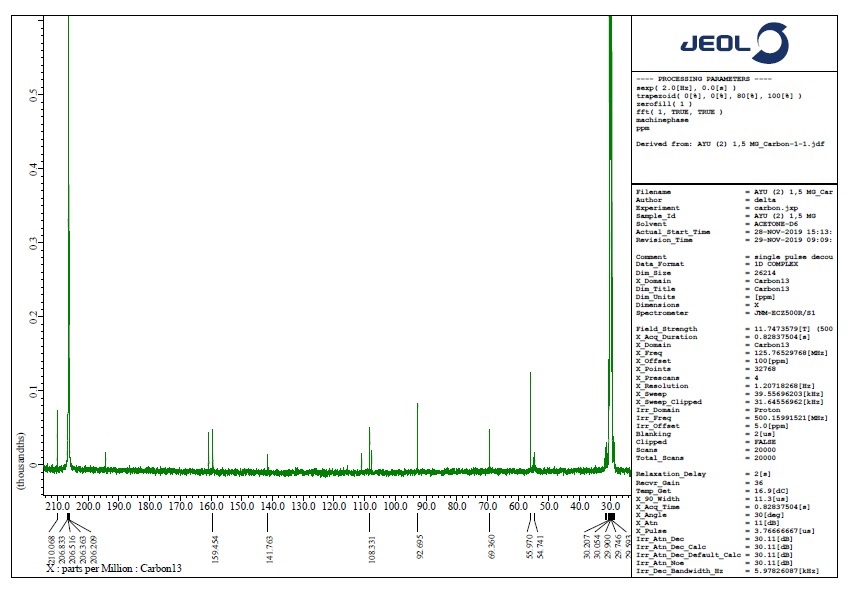


**Supplementary Material 6** 13C-NMR spectrum for compound **2**.

**
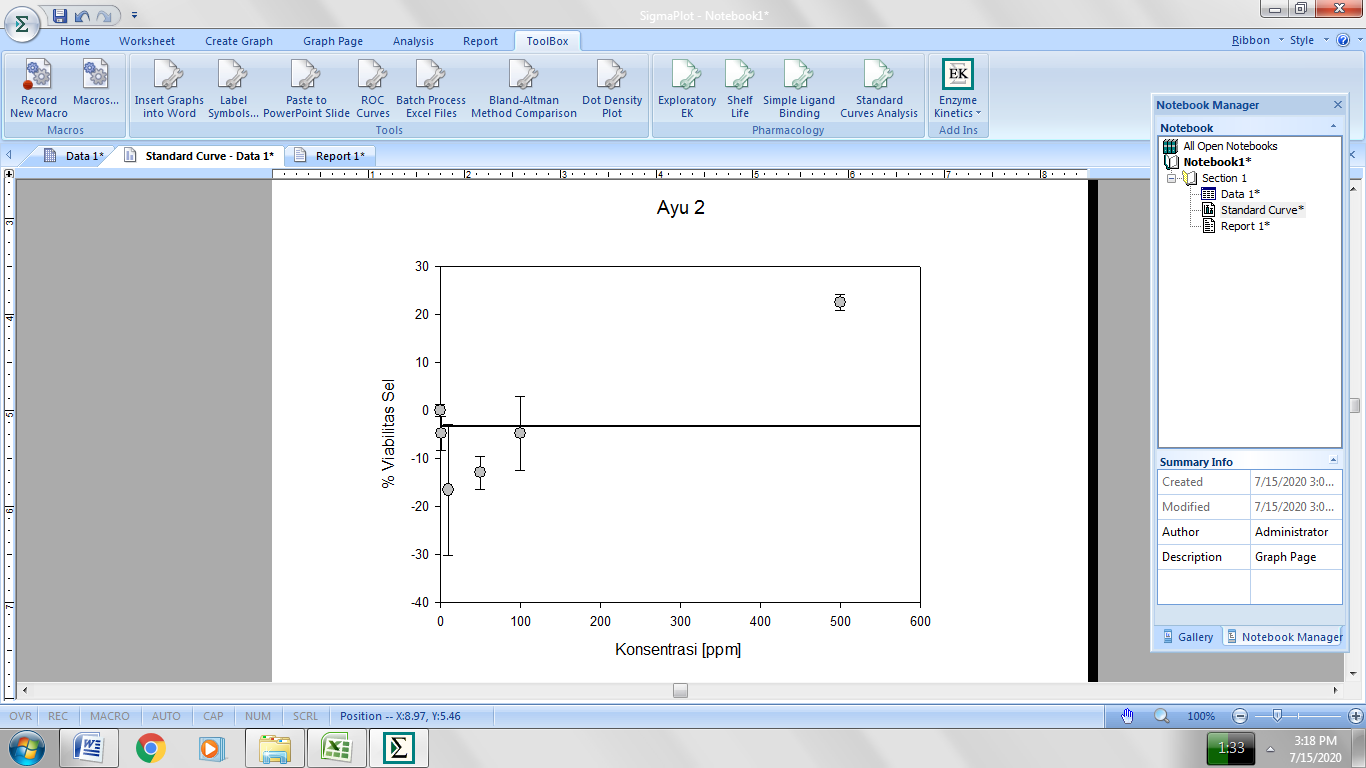
**

Compound **1**

% Cell viability

Concentration (ppm)

**Supplementary Material 7** The IC50 value of Compound **1**, depsidone, against MCF-7 cell lines.


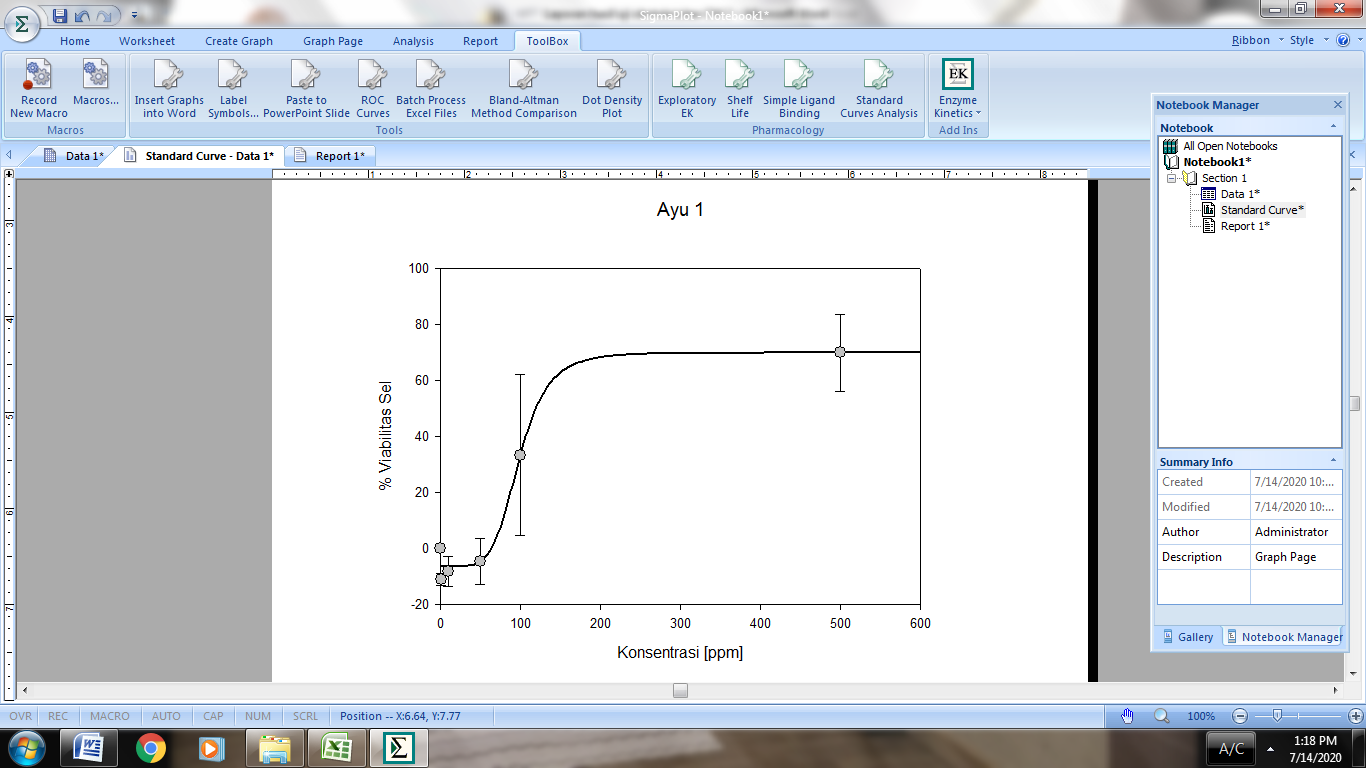


% Cell viability

Compound **2**

Concentration (ppm)

**Supplementary Material 8** The IC50 value of Compound **2**, benzophenone, against MCF-7 cell lines.

% Cell viability

Concentration (ppm)

**Supplementary Material 9** The IC50 value of doxorubicin against MCF-7 cell lines.
